# Supplementary material for: Prevalence of Potential Indicators of Welfare Status in Young Calves at Meat Processing Premises in New Zealand
Source: MDPI journal article supplement (doi:10.3390/ani11082467), 2021-08-23
Supplement: s1 [file s1]

Supplementary file A: Recording form for group level observations used during field observations made at 12 meat processing plants across New Zealand during the 2016 bobby calf season.

### Group Level Observations

Pen Number

Time of Arrival

Time of observations

Pen location

Dimension of pens

Length

x

Width

Shelter provided

Roof

Walls

Temperature

Wind speed

Number of animals in pen

Number of animals lying in the pen

Standing

### Behavioural Observations

|           | Number of animals per group | % of group |
|-----------|-----------------------------|------------|
| Shivering |                             |            |
| Panting   |                             |            |
| Huddling  |                             |            |

|                        |  |  |
|------------------------|--|--|
| <b>Oral Behaviours</b> |  |  |
| <b>Vocalisation</b>    |  |  |
| <b>Head tilting</b>    |  |  |
| <b>Head shaking</b>    |  |  |

Behaviours  
demonstrating

**Health**  
**Observations**

|                                | Number of animals per group | % of group |
|--------------------------------|-----------------------------|------------|
| <b>Coughing</b>                |                             |            |
| <b>Hampered respiration</b>    |                             |            |
| <b>Severe Ocular discharge</b> |                             |            |
| <b>Severe Nasal discharge</b>  |                             |            |

**Faecal Soiling**

|                  | Number of animals per group | % of group |
|------------------|-----------------------------|------------|
| No               |                             |            |
| Moderately Dirty |                             |            |
| Extremely Dirty  |                             |            |

| Injury | # of animals | % of group |                                            |
|--------|--------------|------------|--------------------------------------------|
| 0      |              |            | No visual wounds/injuries                  |
| 1      |              |            | Hair loss                                  |
| 2      |              |            | Moderate swelling and/or superficial wound |
| 3      |              |            | Minor cut through skin or obvious swelling |
| 4      |              |            | Wound through skin with deeper damage      |
| 5      |              |            | Injury resulting in loss of function       |

**Walk-through completed**

Y / N

(only if there are calves lying down)

Number of calves lying immediately prior to walk-through

Number of calves that got up when observer first entered the pen

Number of calves that get up during systematic walk

Number of calves that get up when approached within 0.5m (after walk-through)

Number of calves that did not get up (non-ambulatory)

Exhaustion?

Number of calves that return to lying 5minutes after walk-through

Comment on position  
lying

|  |
|--|
|  |
|--|

Water source  
working

|       |
|-------|
| Y / N |
|-------|

**Comments and  
Notes**

*Diarrhoea*
