# Supplementary material for: Prevalence of Potential Indicators of Welfare Status in Young Calves at Meat Processing Premises in New Zealand
Source: MDPI journal article supplement (doi:10.3390/ani11082467), 2021-08-23
Supplement: s1 [file s1]

**Supplementary file B: Recording form for group level observations used during field observations made at 12 meat processing plants across New Zealand during the 2016 bobby calf season.**

**Individual Level Observations**

Pen Number

 / 

Animal Number

 / 

Calf standing

 Y /  N

If no, lying position

**Indicators**

**Shivering**

Yes

No

**Panting**

Normal respiration

20-40 breaths per minute

Mild Heat Stress

Closed mouth breathing w/ respiration elevated over 20-40 breaths/min

Panting

Open mouth breathing with respiration elevated over 40 breaths/min

**Respiration Rate**

breaths per minute

**Hampered respiration**

**Coughing**

**Vocalisation**

Vocalising?

Y / N

If yes

Rate over 2  
minutesDuratio  
n**Oral Behaviours**

Y / N

Manipulating an object

Manipulating a calf

Tongue Playing

Other

biting, suckling,  
licking

cross-suckling

**Head tilting****Head shaking****Faecal Soiling**

No

Moderately Dirty

Extremely Dirty

**Injury**

0

No visual  
wounds/injuries

1

Hair  
loss

|   |  |                                                                      |
|---|--|----------------------------------------------------------------------|
| 2 |  | Moderate swelling and/or superficial wound where skin not perforated |
| 3 |  | Minor cut through skin or obvious swelling                           |
| 4 |  | Wound through skin with damage to deeper tissues                     |
| 5 |  | Injury resulting in loss of function                                 |

**Ocular discharge present**

Y / N

If yes:

Mild

Severe

**Nasal discharge present**

Y / N

If yes:

Mild

Severe

**Dehydration**

Time for skin to return to normal after skin tent:

**General  
demeanour**

Bright

Tired

Weak

**Navel**

Wet

Raw

Dry

**Eyes**

Bright

Dull

Closed

**Ears**

Forwards

Back

Alert

|             |     |       |     |       |
|-------------|-----|-------|-----|-------|
| <b>Coat</b> | Dry | Clean | Wet | Dirty |
|-------------|-----|-------|-----|-------|

|               |        |                  |
|---------------|--------|------------------|
| <b>Hooves</b> | Strong | Soft/undeveloped |
|---------------|--------|------------------|

**Sex**

**Breed**

**Comments and  
Notes**

*Diarrhoea*

*Lesions*

*Lameness*

*Ectoparasitism*

*Mucous  
Membranes*
